# Supplementary material for: Dynamics of thymus organogenesis and colonization in early human development
Source: PubMed Central journal article supplement — Development. 2013 May 1;140(9):2015–26. doi: 10.1242/dev.087320 (PMC3631974; doi:10.1242/dev.087320), 2013-05-01
Supplement: supp_140.9.2015_DEV087320.pdf [file supp_140.9.2015_DEV087320.pdf]

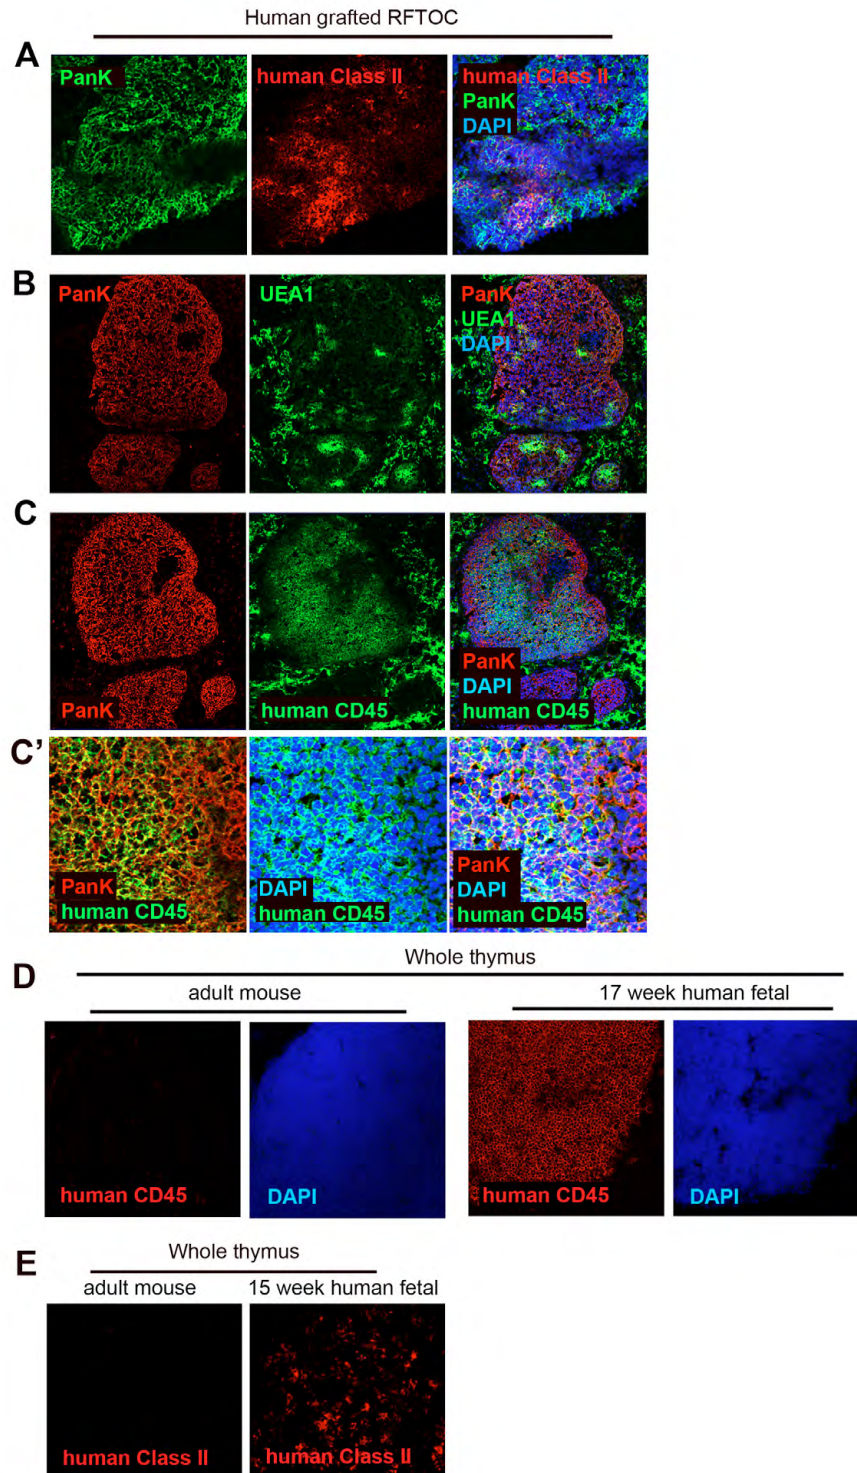

**Fig. S1. Development of human CD45+ cells within a grafted human fetal RFTOC.** (A-C') Thymic primordia were microdissected free of connective tissue from two week 8 human fetuses, dissociated to single cell suspensions, and then reaggregated together with mouse primary embryonic fibroblasts as described in the methods. This cellular reaggregate was grafted under the kidney capsule of a NOD/SCID mouse. The graft was recovered after 2 weeks and analyzed by immunohistochemistry with the antibodies shown. (A) Pancytokeratin (panK) and MHC Class II (Class II); (B) Pancytokeratin (panK) and UEA1; (C) Pancytokeratin (panK) and human CD45. C' shows higher magnification images showing detail from C. (D) Positive and negative control staining with anti-human CD45. Left panels, adult mouse thymus; right panels, 17 week human fetal thymus. (E) Positive and negative control staining with anti-human MHC Class II (HLA-DR). Left panel, adult mouse thymus, right panel, 15 week human fetal thymus. PanK, pancytokeratin.

| Primer name | Primer sequence              |
|-------------|------------------------------|
| FOXN1F      | 5' GAAACCTGTGGGAACAGTTG3'    |
| FOXN1R      | 5' ACTTCCAGACCAGGCAAACG 3'   |
| HOXA3F      | 5' CTGGAATGAAAGAGTCGCCACC 3' |
| HOXA3R      | 5' CCAGCGAATGCATAGAGTTC 3'   |
| PAX1F       | 5' CCAACGTGGTCAAGCACATC 3'   |
| PAX1R       | 5' CGAAGGCAGGTTTCTCTAGC 3'   |
| PAX9F       | 5' CCAGCAGGGTCAGGACGACT 3'   |
| PAX9R       | 5' ATGCTGGATGCTGACACAAA 3'   |
| BMP4F       | 5' GAAGCTAGGTGAGTGTGGC 3'    |
| BMP4R       | 5' AGACCAGTGCTGTGGATCTG 3'   |
| BMP2F       | 5' GTTGTGTGTCAGCACTTGGC 3'   |
| BMP2R       | 5' TCGGATACAGGTCTAGCATG 3'   |
| TBX1F       | 5' TGCAGCTAGAGATGAAGGCG 3'   |
| TBX1R       | 5' CAATCTTGAGCTGCGTGATA 3'   |
| CLDN4 F     | 5' CCCCAGCGCTTGGAAATCC 3'    |
| CLDN4R      | 5'TGGATGATGTTGTGGGCCG3'      |
| P63F        | 5'AGGAAGGCGGATGAAGATAGC3'    |
| P63R        | 5'AGGAATGGTTGTAGGAGTGAG3'    |

**Table S1. Primer sequences used to amplify *in situ* hybridization probes.** All probes were made to 5' UTR regions. F, forward. R, Reverse.

| Affymetrix identifier | Gene symbol   | CB094     |                     | CB106     |                     | CB388     |                     |
|-----------------------|---------------|-----------|---------------------|-----------|---------------------|-----------|---------------------|
|                       |               | mas5 flag | RMA expression rank | mas5 flag | RMA expression rank | mas5 flag | RMA expression rank |
| 205051_s_at           | CD117 (c Kit) | P         | 14420               | A         | 17793               | P         | 10630               |
| 205798_at             | IL7R          | A         | 31037               | M         | 22399               | P         | 9679                |
| 212588_at             | PTPRC (CD45)  | P         | 25795               | P         | 10471               | P         | 1658                |
| 206591_at             | RAG1          | A         | 32543               | A         | 31822               | P         | 16451               |
| 215492_x_at           | PTCRA         | A         | 17682               | A         | 17021               | P         | 17525               |
| 213539_at             | CD3D          | M         | 21878               | P         | 11721               | P         | 3121                |
| 213193_x_at           | TRBC1         | P         | 27612               | P         | 19363               | P         | 6372                |
| 215806_x_at           | TARP TRGC2    | A         | 31092               | P         | 24829               | P         | 11009               |
| 201839_s_at           | EPCAM         | P         | 1187                | P         | 3308                | P         | 2468                |

**Table S2. Expression of genes associated with early human thymocyte development in mid-week 8 human thymic lobes.** RNA was prepared from three independent mid-week 8 thymic lobes microdissected free of any other cells or tissues (CB094, CS20; CB388, CS21/22; CB106, CS22) and was processed for microarray analysis as described in Materials and methods. Note, the name of each sample includes both an identifier (e.g. CB094) and the Carnegie stage of that sample (e.g. CS20). The microarray data were normalized independently using RMA and MAS5, and the probe sets were then ranked based on the resulting expression values, with the probe set having the highest expression given rank 1. The data presented show ranks for selected probe sets along with the corresponding MAS5 PMA flag [present (P), marginal (M) and absent (A)]. For a given probe set the lower the rank, the higher the probability of the gene being present in the sample, whereas MAS5 predicts the presence or absence of a gene using different statistics. Data are presented for selected genes involved in early human thymocyte development and for EPCAM, which marks all thymic epithelial cells in the thymic primordium. CD117, c-KIT; IL7R, interleukin 7 receptor; PTPRC, protein tyrosine phosphatase receptor type C (CD45); RAG1, recombination activating gene 1; PTCRA, pre-T cell antigen receptor alpha; CD3D, CD3 delta chain; TRBC1, T cell receptor beta constant region 1; TARP/TRGC2, TCR gamma alternate reading frame protein/T cell receptor gamma constant region 2; EPCAM, epithelial cell adhesion molecule. CS, Carnegie stage. Note that pre-Ta and RAG1 expression is detected only in the oldest of the three thymic primordia.

|              | Human                                                  | Mouse   | Human | Mouse   | Human | Mouse   |
|--------------|--------------------------------------------------------|---------|-------|---------|-------|---------|
|              | Wk 6                                                   | E10-E11 | Wk7   | E11-E12 | Wk8   | E12-E13 |
| <b>Genes</b> | <b>Pharyngeal endoderm and thymus organogenesis</b>    |         |       |         |       |         |
| HOXA3        | +                                                      | +       | NT    | +       | NT    | +       |
| TBX1         | +                                                      | +       | NT    | +       | NT    | +       |
| PAX1         | +                                                      | +       | NT    | +       | NT    | +       |
| PAX9         | +                                                      | +       | NT    | +       | NT    | +       |
| FOXP1        | +                                                      | +       | NT    | +       | +     | +       |
| BMP4         | +                                                      | +       | NT    | +       | NT    | +       |
| BMP2         | +                                                      | +       | NT    | +       | NT    | +       |
| P63          | +                                                      | +       | NT    | +       | +     | +       |
| PLET1        | -                                                      | +       | -     | +       | -     | +       |
| RHOX4        | -                                                      | +       | -     | +       | -     | +       |
|              | <b>Thymic epithelial cells</b>                         |         |       |         |       |         |
| EPCAM        | NT                                                     | +       | +     | +       | +     | +       |
| CLDN4        | NT                                                     | +       | +     | +       | +     | +       |
| UEA1         | NT                                                     | -       | +     | -       | +     | -       |
| MHC Class II | NT                                                     | -       | -     | -       | +     | +       |
| Keratin 5    | NT                                                     | +       | +     | +       | +     | +       |
| Keratin 8    | NT                                                     | +       | +     | +       | +     | +       |
| CDR2         | NT                                                     | NT      | -     | HS      | +     | HS      |
| CD205        | NT                                                     | NT      | -     | -       | +     | +       |
|              | <b>Chemokine expression by thymic epithelial cells</b> |         |       |         |       |         |
| CCL21        |                                                        |         | +     | +       | +     | +       |
| CCL25        |                                                        |         | +     | +       | +     | +       |
|              | <b>Hematopoietic cells</b>                             |         |       |         |       |         |
| CD45         | -                                                      | -       | +     | +       | +     | +       |
| CD34         | -                                                      |         | -     |         | +     |         |
| CD7          | -                                                      |         | -     |         | +     |         |
| MAC1         | -                                                      | -       | NT    | +       | +     | +       |
|              | <b>Mesenchymal and endothelial cells</b>               |         |       |         |       |         |
| TE7          |                                                        |         | +     | HS      | +     | HS      |
| CD34         |                                                        |         | +     |         | +     |         |
| CD31         |                                                        |         | +     | +       | +     | +       |
| VE Cadherin  |                                                        |         | +     | +       | +     | +       |

**Table S3. Summary of comparative analysis of human and mouse thymus development.** The table summarizes the data shown in Figs 1-7. The time of onset of TEC differentiation is week 8, defined by the first point at which markers restricted to prospective cortical and medullary TEC are evident. 1, time of onset of expression; 2, time at which expression restricted to medullary-fated TECs; 3 time at which expression restricted to cortical-fated TECs; 4, time of initial colonization. \*Rare intrathymic CD45+ cells present at week 7. \*\*E11.25-E11.5. Shading of adjacent columns indicates equivalent stages of thymus development. HS, human specific; NT, not tested.
